# Supplementary material for: Probing locus coeruleus functional network in healthy aging and its association with Alzheimer’s disease biomarkers using pupillometry
Source: Springer Nature journal article supplement (doi:10.1186/s13195-025-01701-1), 2025-02-27
Supplement: MOESM1 [file 13195_2025_1701_MOESM1_ESM.pdf]

# **Probing locus coeruleus functional network in healthy aging and its association with Alzheimer's disease biomarkers using pupillometry**

**Supplementary Table S1.** Voxel clusters significantly correlated with the pupil diameter time series

| Cluster name                            | Peak coordinates in MNI space | Cluster size (voxels) |
|-----------------------------------------|-------------------------------|-----------------------|
| Anterior cingulate                      | +0 +32 +24                    | 20410                 |
| Inferior lateral occipital cortex right | +42 -66 -8                    | 12096                 |
| Inferior lateral occipital cortex left  | -40 -80 -4                    | 8634                  |
| Postcentral gyrus left                  | -42 -26 +68                   | 2807                  |
| Medial frontal cortex*                  | -8 +40 -20                    | 1509                  |
| Temporal pole right                     | +40 +20 -40                   | 1202                  |
| Anterior supramarginal gyrus left       | -58 -38 +32                   | 1024                  |
| Anterior supramarginal gyrus right      | +68 -30 +30                   | 840                   |
| unlabeled*                              | -18 +38 +56                   | 831                   |
| Frontal pole left                       | -44 +46 -14                   | 757                   |
| Frontal pole right                      | +30 +52 +26                   | 732                   |
| Middle frontal gyrus left               | -30 +36 +38                   | 639                   |
| Amygdala right                          | +24 -8 -18                    | 389                   |
| Frontal pole right                      | +46 +48 -16                   | 341                   |
| Hippocampus left                        | -22 -10 -18                   | 251                   |
| <b>unlabeled*</b>                       | <b>+20 +32 +0</b>             | <b>171</b>            |
| Superior frontal gyrus left             | -16 +4 +70                    | 156                   |
| unlabeled*                              | +46 -10 -48                   | 119                   |
| Middle frontal gyrus right*             | +38 +26 +56                   | 118                   |
| <b>unlabeled*</b>                       | <b>-22 +22 +20</b>            | <b>114</b>            |
| <b>unlabeled*</b>                       | <b>-20 +30 +0</b>             | <b>97</b>             |
| Frontal pole left                       | -10 +64 +0                    | 86                    |
| unlabeled*                              | +20 +32 -30                   | 74                    |

MNI, Montreal Neurological Institute.

Clusters shown in red positively correlated with pupil diameter, while clusters shown in blue negatively correlated.

Clusters were named based on the CONN atlas regions of the peak voxels. If the peak voxel was not labeled, the immediately adjacent 26 voxels were scanned, and the cluster was named based on the adjacent voxels' labels, with an asterisk (\*) appended to the end of the cluster name. If neither the peak voxel nor the immediately adjacent voxels were labeled in the CONN atlas, the cluster was named as "unlabeled\*". If a cluster's peak voxel was unlabeled and the cluster was clearly located in the white matter, the cluster was subsequently discarded from further analysis (**bolded**).

**Supplementary Table S2.** Voxel clusters significantly correlated with the first derivative time series

| Cluster name                           | Peak coordinates in MNI space | Cluster size (voxels) |
|----------------------------------------|-------------------------------|-----------------------|
| Inferior lateral occipital cortex left | -46 -76 +0                    | 65931                 |
| Paracingulate gyrus left               | -10 +44 -4                    | 6299                  |
| unlabeled*                             | +2 -40 +8                     | 937                   |
| Hippocampus right                      | +32 -8 -22                    | 516                   |
| Hippocampus left                       | -26 -6 -26                    | 387                   |
| Frontal pole right                     | +4 +62 -26                    | 377                   |
| Angular gyrus right                    | +48 -50 +42                   | 359                   |
| Cerebellum crus2 left                  | -38 -70 -38                   | 297                   |
| Cerebellum crus1 right                 | +36 -56 -30                   | 293                   |
| unlabeled*                             | +10 -10 -12                   | 271                   |
| Superior frontal gyrus right           | +18 +24 +62                   | 267                   |
| Angular gyrus left                     | -52 -52 +40                   | 219                   |
| Superior frontal gyrus left            | -16 +18 +66                   | 218                   |
| Vermis 9                               | +0 -50 -36                    | 157                   |
| <b>unlabeled*</b>                      | <b>+14 -34 +24</b>            | <b>131</b>            |
| Frontal pole left                      | -22 +46 +32                   | 96                    |
| Frontal orbital cortex right           | +32 +22 -14                   | 90                    |
| Middle frontal gyrus left              | -26 +26 +34                   | 79                    |
| Precuneus*                             | +0 -62 +64                    | 71                    |
| Posterior middle temporal gyrus right  | +60 -26 -12                   | 67                    |
| Middle frontal gyrus right             | +42 +22 +40                   | 64                    |

MNI, Montreal Neurological Institute.

Clusters shown in red positively correlated with the first derivative of pupil diameter, while clusters shown in blue negatively correlated.

Clusters were named based on the CONN atlas regions of the peak voxels. If the peak voxel was not labeled, the immediately adjacent 26 voxels were scanned, and the cluster was named based on the adjacent voxels' labels, with an asterisk (\*) appended to the end of the cluster name. If neither the peak voxel nor the immediately adjacent voxels were labeled in the CONN atlas, the cluster was

named as “unlabeled\*”. If a cluster’s peak voxel was unlabeled and the cluster was clearly located in the white matter, the cluster was subsequently discarded from further analysis (bolded).

**Supplementary Table S3.** Voxel clusters differentially correlated with the first derivative time series between young and older participants

| Cluster name                                         | Peak coordinates in MNI space | Cluster size (voxels) |
|------------------------------------------------------|-------------------------------|-----------------------|
| Precentral gyrus right                               | +08 -20 +78                   | 352                   |
| Lateral occipital cortex, inferior division left     | -44 -70 +06                   | 212                   |
| Lateral occipital cortex, superior division left     | -28 -66 +52                   | 182                   |
| Inferior temporal gyrus, temporooccipital part right | +46 -56 -10                   | 77                    |
| Temporal fusiform cortex, posterior division right   | +40 -36 -26                   | 72                    |
| Temporal pole left                                   | -52 +08 -24                   | 60                    |
| Frontal pole left                                    | -14 +50 +32                   | 56                    |
| Lateral occipital cortex, superior division right    | +32 -86 +24                   | 53                    |
| Temporal pole right                                  | +48 +18 -34                   | 53                    |
| Supramarginal gyrus, anterior division left          | -46 -32 +38                   | 48                    |
| Lateral occipital cortex, inferior division left     | -52 -64 -16                   | 48                    |

MNI, Montreal Neurological Institute.

All clusters identified were less correlated with the first derivative of pupil diameter in older participants.

Clusters were named based on the CONN atlas regions of the peak voxels. If the peak voxel was not labeled, the immediately adjacent 26 voxels were scanned, and the cluster was named based on the adjacent voxels' labels, with an asterisk (\*) appended to the end of the cluster name.

**Supplementary Table S4.** Correlations of functional networks with neuropsychological performance using multiple regression controlling for age, sex, and education

| Cluster name                                  | Peak coordinates<br>in MNI space | Neuropsychological<br>assessment | Test domain               | <i>r</i> -statistic | <i>P</i> -value |
|-----------------------------------------------|----------------------------------|----------------------------------|---------------------------|---------------------|-----------------|
| Pupil diameter time series as a seed signal   |                                  |                                  |                           |                     |                 |
| Anterior supramarginal gyrus left             | -58 -38 +32                      | FCSRT free recall                | Memory                    | 0.640               | < 0.001         |
| Anterior supramarginal gyrus right            | +68 -30 +30                      | FCSRT free recall                | Memory                    | 0.462               | 0.016           |
| Superior frontal gyrus left                   | -16 +4 +70                       | FCSRT free recall                | Memory                    | 0.505               | 0.005           |
| unlabeled*                                    | +20 +32 -30                      | FCSRT free recall                | Memory                    | -0.502              | 0.005           |
| Frontal pole right                            | +46 +48 -16                      | Letter Fluency (FAS)             | Language<br>and executive | 0.569               | < 0.001         |
| Middle frontal gyrus left                     | -30 +36 +38                      | TMTA                             | Executive                 | 0.393               | 0.062           |
| Hippocampus left                              | -22 -10 -18                      | TMTB – TMTA                      | Executive                 | 0.446               | 0.023           |
| First derivative time series as a seed signal |                                  |                                  |                           |                     |                 |
| Posterior middle temporal gyrus right         | +60 -26 -12                      | RCFT immediate free recall       | Memory                    | -0.459              | 0.018           |
| Vermis 9                                      | +0 -50 -36                       | RCFT delayed free recall         | Memory                    | -0.396              | 0.050           |
| Hippocampus right                             | +32 -8 -22                       | RCFT copy accuracy score         | Visuospatial              | 0.564               | 0.001           |
| Precuneus*                                    | +0 -62 +64                       | JoLO                             | Visuospatial              | 0.430               | 0.030           |

MNI, Montreal Neurological Institute; FCSRT, Free and Cued Selective Reminding Test; TMTA, Trail Making Test Part A; TMTB, Trail Making Test Part B; RCFT, Rey Complex Figure Test; JoLO, Judgment of Line Orientation.

The associations were evaluated using multiple regression with age, sex, and education as covariates. *P*-values were adjusted for multiple comparisons using false discovery rate correction.

Clusters were named based on the CONN atlas regions of the peak voxels. If the peak voxel was not labeled, the immediately adjacent 26 voxels were scanned, and the cluster was named based on the adjacent voxels' labels, with an asterisk (\*) appended to the end of the cluster name. If neither the peak voxel nor the immediately adjacent voxels were labeled in the CONN atlas, the cluster was named as "unlabeled\*".

**Supplementary Table S5.** Correlations of functional networks with neuropsychological performance in healthy older participants

| Cluster name                                  | Peak coordinates<br>in MNI space | Neuropsychological<br>assessment | Test domain       | <i>r</i> -statistic | <i>P</i> -value |
|-----------------------------------------------|----------------------------------|----------------------------------|-------------------|---------------------|-----------------|
| Pupil diameter time series as a seed signal   |                                  |                                  |                   |                     |                 |
| Anterior supramarginal gyrus right            | +68 -30 +30                      | MoCA                             | Overall cognition | 0.605               | 0.018           |
| unlabeled*                                    | -18 +38 +56                      | MoCA                             | Overall cognition | -0.609              | 0.018           |
| Medial frontal cortex*                        | -8 +40 -20                       | FCSRT free recall                | Memory            | -0.724              | 0.002           |
| Anterior supramarginal gyrus left             | -58 -38 +32                      | FCSRT free recall                | Memory            | 0.664               | 0.007           |
| Anterior supramarginal gyrus right            | +68 -30 +30                      | FCSRT free recall                | Memory            | 0.685               | 0.005           |
| unlabeled*                                    | -18 +38 +56                      | FCSRT free recall                | Memory            | -0.732              | 0.002           |
| Frontal pole left                             | -10 +64 +0                       | FCSRT free recall                | Memory            | -0.636              | 0.013           |
| Middle frontal gyrus right*                   | +38 +26 +56                      | RCFT copy accuracy score         | Visuospatial      | -0.574              | 0.034           |
| Anterior cingulate                            | +0 +32 +24                       | JoLO                             | Visuospatial      | 0.604               | 0.018           |
| Middle frontal gyrus left                     | -30 +36 +38                      | TMTA                             | Executive         | 0.621               | 0.017           |
| First derivative time series as a seed signal |                                  |                                  |                   |                     |                 |
| Vermis 9                                      | +0 -50 -36                       | RCFT delayed free recall         | Memory            | -0.613              | 0.042           |
| Hippocampus right                             | +32 -8 -22                       | RCFT copy accuracy score         | Visuospatial      | 0.823               | < 0.001         |
| Precuneus*                                    | +0 -62 +64                       | JoLO                             | Visuospatial      | 0.622               | 0.042           |

MNI, Montreal Neurological Institute; MoCA, Montreal Cognitive Assessment; FCSRT, Free and Cued Selective Reminding Test; TMTA, Trail Making Test Part A; TMTB, Trail Making Test Part B; RCFT, Rey Complex Figure Test; JoLO, Judgment of Line Orientation.



The associations were evaluated using multiple regression with age and sex as covariates in healthy older participants. *P*-values were adjusted for multiple comparisons using false discovery rate correction.

Clusters were named based on the CONN atlas regions of the peak voxels. If the peak voxel was not labeled, the immediately adjacent 26 voxels were scanned, and the cluster was named based on the adjacent voxels' labels, with an asterisk (\*) appended to the end of the cluster name. If neither the peak voxel nor the immediately adjacent voxels were labeled in the CONN atlas, the cluster was named as "unlabeled\*".

**Supplementary Table S6.** Correlations of local correlation with neuropsychological performance

| Cluster name                                  | Peak coordinates<br>in MNI space | Neuropsychological<br>assessment | Test domain               | <i>r</i> -statistic | <i>P</i> -value |
|-----------------------------------------------|----------------------------------|----------------------------------|---------------------------|---------------------|-----------------|
| Pupil diameter time series as a seed signal   |                                  |                                  |                           |                     |                 |
| Anterior supramarginal gyrus left             | -58 -38 +32                      | FCSRT free recall                | Memory                    | 0.179               | 0.524           |
| Anterior supramarginal gyrus right            | +68 -30 +30                      | FCSRT free recall                | Memory                    | 0.209               | 0.411           |
| Superior frontal gyrus left                   | -16 +4 +70                       | FCSRT free recall                | Memory                    | 0.129               | 0.566           |
| unlabeled*                                    | +20 +32 -30                      | FCSRT free recall                | Memory                    | -0.061              | 0.816           |
| Frontal pole right                            | +46 +48 -16                      | Letter Fluency (FAS)             | Language<br>and executive | -0.175              | 0.524           |
| Middle frontal gyrus left                     | -30 +36 +38                      | TMTA                             | Executive                 | -0.063              | 0.812           |
| Hippocampus left                              | -22 -10 -18                      | TMTB – TMTA                      | Executive                 | 0.335               | 0.152           |
| First derivative time series as a seed signal |                                  |                                  |                           |                     |                 |
| Posterior middle temporal gyrus right         | +60 -26 -12                      | RCFT immediate free recall       | Memory                    | -0.166              | 0.652           |
| Vermis 9                                      | +0 -50 -36                       | RCFT delayed free recall         | Memory                    | -0.191              | 0.562           |
| Hippocampus right                             | +32 -8 -22                       | RCFT copy accuracy score         | Visuospatial              | -0.280              | 0.358           |
| Precuneus*                                    | +0 -62 +64                       | JoLO                             | Visuospatial              | 0.051               | 0.937           |

MNI, Montreal Neurological Institute; FCSRT, Free and Cued Selective Reminding Test; TMTA, Trail Making Test Part A; TMTB, Trail Making Test Part B; RCFT, Rey Complex Figure Test; JoLO, Judgment of Line Orientation.

The associations were evaluated using multiple regression with age and sex as covariates. *P*-values were adjusted for multiple comparisons using false discovery rate correction.

Clusters were named based on the CONN atlas regions of the peak voxels. If the peak voxel was not labeled, the immediately adjacent 26 voxels were scanned, and the cluster was named based on the adjacent voxels' labels, with an asterisk (\*) appended to the end of the cluster name. If neither the peak voxel nor the immediately adjacent voxels were labeled in the CONN atlas, the cluster was named as "unlabeled\*".

**Supplementary Table S7.** Correlations of local correlation with CSF biomarkers

| Cluster name                                  | Peak coordinates<br>in MNI space | CSF<br>biomarker      | <i>r</i> -statistic | <i>P</i> -value |
|-----------------------------------------------|----------------------------------|-----------------------|---------------------|-----------------|
| Pupil diameter time series as a seed signal   |                                  |                       |                     |                 |
| Frontal pole left                             | -10 +64 +0                       | T-tau                 | -0.204              | 0.591           |
| Frontal pole left                             | -10 +64 +0                       | T-tau/A $\beta$ ratio | -0.163              | 0.681           |
| First derivative time series as a seed signal |                                  |                       |                     |                 |
| Frontal pole right                            | +4 +62 -26                       | T-tau                 | 0.030               | 0.979           |

MNI, Montreal Neurological Institute; CSF, cerebrospinal fluid; T-tau, total tau; A $\beta$ , Amyloid- $\beta$  1-42.

The associations were evaluated using multiple regression with age and sex as covariates. *P*-values were adjusted for multiple comparisons using false discovery rate correction.

Clusters were named based on the CONN atlas regions of the peak voxels.
